# Supplementary material
Source: PubMed Central journal article supplement (PMC6367062)
Supplement: NIHMS991737-supplement-2.pdf [file NIHMS991737-supplement-2.pdf]

**Top biological functions representing differentially expressed genes between ShCtr and ShHuR under hypoxia, as identified by Ingenuity Pathway Analysis**

|                                                      | <b>Category</b>                                | <b>p-value</b>      | <b>No. Molecules</b> |
|------------------------------------------------------|------------------------------------------------|---------------------|----------------------|
| <b>Diseases and Disorders</b>                        | Cancer                                         | 5.05E-06 - 4.80E-28 | 1750                 |
|                                                      | Organismal Injury and Abnormalities            | 5.29E-06 - 4.80E-28 | 1796                 |
|                                                      | Gastrointestinal Disease                       | 4.71E-06 - 7.43E-25 | 1526                 |
|                                                      | Hepatic System Disease                         | 2.39E-06 - 4.25E-17 | 821                  |
|                                                      | Reproductive System Disease                    | 4.85E-06 - 1.14E-16 | 936                  |
| <b>Molecular and Cellular Functions</b>              | Cellular Movement                              | 5.00E-06 - 6.99E-36 | 452                  |
|                                                      | Cellular Growth and Proliferation              | 3.31E-06 - 4.87E-32 | 700                  |
|                                                      | Cell Death and Survival                        | 4.87E-06 - 4.50E-24 | 624                  |
|                                                      | Cellular Development                           | 3.31E-06 - 8.19E-24 | 618                  |
|                                                      | Cell Morphology                                | 1.19E-06 - 7.49E-19 | 473                  |
| <b>Physiological System Development and Function</b> | Organismal Survival                            | 3.50E-07 - 7.35E-30 | 555                  |
|                                                      | Cardiovascular System Development and Function | 5.13E-06 - 4.60E-25 | 330                  |
|                                                      | Organismal Development                         | 4.79E-06 - 1.78E-20 | 643                  |
|                                                      | Tissue Morphology                              | 5.13E-06 - 4.28E-19 | 489                  |
|                                                      | Embryonic Development                          | 2.02E-06 - 4.60E-18 | 337                  |
