# Supplementary material
Source: PubMed Central journal article supplement (PMC6367062)
Supplement: NIHMS991737-supplement-3.pdf [file NIHMS991737-supplement-3.pdf]

**Top networks representing differentially expressed genes between ShCtr and ShHuR  
under hypoxia, as identified by Ingenuity Pathway Analysis**

| Network                                                                                                                  | Focus<br>Molecules | Score |
|--------------------------------------------------------------------------------------------------------------------------|--------------------|-------|
| Small Molecule Biochemistry, Lipid Metabolism, Vitamin and Mineral Metabolism                                            | 35                 | 34    |
| Cellular Movement, Cell Cycle, Cardiovascular System Development and Function                                            | 34                 | 32    |
| Connective Tissue Disorders, Organismal Injury and Abnormalities, Cellular Movement                                      | 34                 | 32    |
| Connective Tissue Development and Function, Embryonic Development, Skeletal and Muscular System Development and Function | 33                 | 30    |
| Endocrine System Disorders, Metabolic Disease, Cell Death and Survival                                                   | 33                 | 30    |
| Carbohydrate Metabolism, Molecular Transport, Small Molecule Biochemistry                                                | 32                 | 28    |
| Immunological Disease, Inflammatory Disease, Inflammatory Response                                                       | 32                 | 28    |
| Cellular Movement, Connective Tissue Development and Function, Cardiovascular System Development and Function            | 31                 | 26    |
| Hematological Disease, Hereditary Disorder, Organismal Injury and Abnormalities                                          | 31                 | 26    |
| Cell-To-Cell Signaling and Interaction, Nervous System Development and Function, Cellular Compromise                     | 31                 | 26    |
