# Supplementary material
Source: PubMed Central journal article supplement (PMC6367062)
Supplement: NIHMS991737-supplement-4.pdf [file NIHMS991737-supplement-4.pdf]

**Details of HuR binding sites and their HuR binding potential in genes of interest  
(as seen in HEK293 cells from experimental validation and prediction by Mukherjee N, et al. )**

| Genes     | Total Binding Sites | Binding Location |       |     |        | Assay    |          | Cell Line   |
|-----------|---------------------|------------------|-------|-----|--------|----------|----------|-------------|
|           |                     | 3'UTR            | 5'UTR | CDS | Intron | PAR-CLIP | RIP-Chip | HEK293 cell |
| ELAVL1    | 17                  | +                | -     | +   | -      | +        | +        | +           |
| HIF1A     | 17                  | +                | -     | -   | +      | +        | -        | +           |
| VEGFA     | 5                   | +                | +     | -   | -      | +        | -        | +           |
| PDK1      | 2                   | -                | -     | -   | +      | +        | +        | +           |
| ENO1      | 2                   | -                | -     | -   | +      | +        | -        | +           |
| PFKFB3    | 2                   | +                | -     | -   | +      | +        | -        | +           |
| SDC4      | 6                   | +                | -     | -   | -      | +        | +        | +           |
| PGK1      | 6                   | +                | -     | -   | +      | +        | -        | +           |
| LDHB      | 9                   | -                | -     | +   | +      | +        | -        | +           |
| EGLN3     | 1                   | +                | -     | -   | -      | +        | -        | +           |
| EGLN1     | 6                   | +                | -     | -   | +      | +        | +        | +           |
| TGFB3     | 1                   | -                | +     | -   | -      | +        | +        | +           |
| ITGA2     | 2                   | +                | -     | -   | -      | +        | -        | +           |
| LAMB1     | 2                   | -                | -     | -   | +      | +        | -        | +           |
| GAPDH     | 0                   |                  |       | -   |        |          | -        | -           |
| COL1A1    | 0                   |                  |       | -   |        |          | -        | -           |
| COL3A1    | 0                   |                  |       | -   |        |          | -        | -           |
| SERPINB3A | -                   |                  |       | -   |        |          | -        | -           |
| AQP3      | 0                   |                  |       | -   |        |          | -        | -           |
| PTGES     | 0                   |                  |       | -   |        |          | -        | -           |
| COL11A1   | -                   |                  |       | -   |        |          | -        | -           |
| COL6A1    | 0                   |                  |       | -   |        |          | -        | -           |
| COL6A2    | 0                   |                  |       | -   |        |          | -        | -           |
| COL6A3    | 0                   |                  |       | -   |        |          | -        | -           |
| ITGB8     | 0                   |                  |       | -   |        |          | -        | -           |
| ITGA5     | 0                   |                  |       | -   |        |          | -        | -           |
| LAMB3     | 0                   |                  |       | -   |        |          | -        | -           |
| ACAN      | 0                   |                  |       | -   |        |          | -        | -           |
| COL2A1    | 0                   |                  |       | -   |        |          | -        | -           |
| MMP3      | -                   |                  |       | -   |        |          | -        | -           |
| MMP13     | -                   |                  |       | -   |        |          | -        | -           |
| CA12      | 0                   |                  |       | -   |        |          | -        | -           |

[Mukherjee N, et al. Mol Cell. 2011;43(3):327-39.]
