# Supplementary material
Source: PubMed Central journal article supplement (PMC6367062)

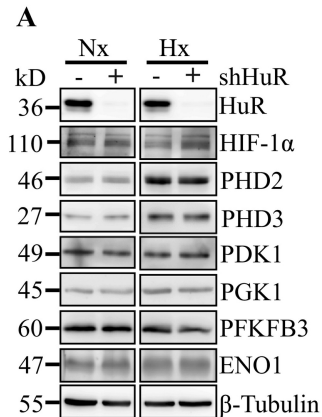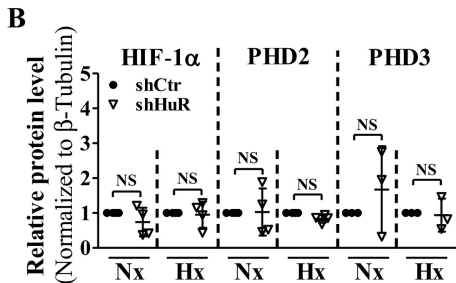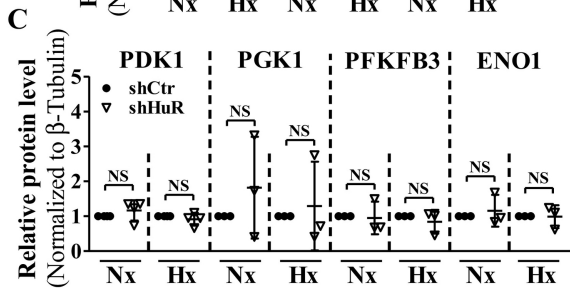

Supplement Figure 1

Supplement: NIHMS991737-supplement-5.pdf [file NIHMS991737-supplement-5.pdf]
